# Supplementary material
Source: MDPI journal article supplement (https://www.mdpi.com/2073-445X/12/9/1664)

# Questionnaire Survey

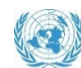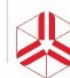

UNITED NATIONS  
UNIVERSITY

## Understanding preference and perception of public green space in Nagpur

The survey is designed to collect primary data for a doctoral research project to understand how local citizens use public green spaces in Nagpur. Participation is voluntary. The duration of the survey is 8-10 mins. The respondent's name will be anonymous, and the information gathered will be kept confidential and will be solely used for academic purposes.

### Section 1: General Information: (to be filled by surveyor)

#### 1.1 Who is the respondent?

☐ Household\_East      ☐ Household\_West      ☐ User\_East      ☐ User\_West

#### 1.2 What is today's date? .....July/Aug

### Section 2: Individual characteristics

#### 2.1 What is your name (respondent)?

#### 2.2 Where do you live? (Geopoint or ward)

2.3 What gender are you?      ☐ Male      ☐ Female      ☐ Other

2.4 How old are you?      ☐ 15-24      ☐ 25-34      ☐ 35-44      ☐ 45-54      ☐ 55-64      ☐ Above 65

2.5 How long have you been staying in this locality?      ☐ Less than 1 yr      ☐ 1-5 yrs      ☐ 6-10 yrs      ☐ 11-15 yrs      ☐ Above 15 yrs

2.6 What is your family structure?      ☐ Single      ☐ Married      ☐ Married with family

#### 2.7 What are your qualifications?

☐ Informal education      ☐ High school      ☐ Diploma      ☐ Bachelors      ☐ Masters      ☐ PhD/equivalent

#### 2.8 What is your employment status?

☐ Employed      ☐ Unemployed      ☐ Retiree      ☐ Student      ☐ House care giver

### Section 3: Preference and usage of neighborhood and ward-level greens:

*(Smaller neighborhood and ward-level public greens maintained by Nagpur Municipal Corporation (NMC) within your locality. Or other accessible greens which are maintained by Government institutions within your locality. This does not include private greens.)*

3.1 Do you visit neighborhood and ward-level public green spaces?      ☐ Yes      ☐ No

3.1a If No, Why?      ☐ No time      ☐ Not interested      ☐ Faraway/ not accessible      ☐ Not well maintained      ☐ Others.....

#### 3.2 Which neighborhood and ward-level public green space do you prefer to visit?

a. Parks and Garden      b. Playgrounds      c. Lake      d. Forest area  
e. University greens      f. Green routes      g. Others .....

#### 3.3 Which neighborhood and ward-level public green space do you visit most? (select only one)

(a)      (b)      (c)      (d)      (e)      (f)      (g)

**3.4 How often do you visit this public GS?**

☐ Once a year      ☐ 2-3 times a year      ☐ Once a month      ☐ Once a fortnight      ☐ Once a week      ☐ Most days      ☐ Everyday

**3.5 What time of the day do you normally visit public GS?**

☐ Morning      ☐ Afternoon      ☐ Evening

**3.6 How far is it from your house? (walking distance)**

☐ < 5mins      ☐ < 10 mins      ☐ < 15 mins      ☐ > 15 mins

**3.7 How do you go from home to this public GS?**

☐ On foot      ☐ Bicycle      ☐ 2-wheeler      ☐ Others .....

**3.8 With whom do you usually go with to this public GS?**

☐ Alone      ☐ Friends      ☐ Spouse      ☐ Child(ren)      ☐ Others.....

**3.9 How long do you usually stay in this public UGS?**

☐ Less than 15 mins      ☐ 15 -30 mins      ☐ 30 mins – 1hour      ☐ 1-2 hours      ☐ Above 2 hours

**3.10 What activities you likely do in this public GS? (select appropriate)**

☐ Sit and relax      ☐ Play with children/ Supervise      ☐ Walk and exercise      ☐ Yoga and meditate      ☐ Spend leisure time with friend /family  
☐ Jog / run      ☐ Sports activities      ☐ Walk the dog      ☐ Others .....

**3.11 What are your motives to visit neighborhood and ward level public GS apart from above activities? (select appropriate)**

☐ For fun time with child (ren)      ☐ For recreation      ☐ To relax and reduce stress      ☐ For peace and quietness      ☐ For sunshine and fresh air  
☐ To be in nature with trees and birds      ☐ For social interaction      ☐ For aesthetic experience      ☐ Others .....

**Section 4: Perceptions of neighborhood and ward level public GS characteristic**

**4.1 How satisfied are you with your neighborhood and ward-level public GS?**

☐ Very satisfied      ☐ Satisfied      ☐ Neutral      ☐ Dissatisfied      ☐ Very dissatisfied

**4.2 What are your opinions on the below statements about neighborhood and ward-level public GS?**

**a There are enough public GS in my area.**

☐ Strongly Agree      ☐ Agree      ☐ Neutral      ☐ Disagree      ☐ Strongly Disagree

**b The public GS is at a walkable distance.**

☐ Strongly Agree      ☐ Agree      ☐ Neutral      ☐ Disagree      ☐ Strongly Disagree

**c The public GS are in good condition and well maintained.**

☐ Strongly Agree      ☐ Agree      ☐ Neutral      ☐ Disagree      ☐ Strongly Disagree

**d The public GS is well equipped with furniture and facilities.**

☐ Strongly Agree      ☐ Agree      ☐ Neutral      ☐ Disagree      ☐ Strongly Disagree

**e The public GS cater to all age groups.**

- ☐ Strongly Agree      ☐ Agree      ☐ Neutral      ☐ Disagree      ☐ Strongly Disagree
- f **The public GS are very small in size.**
- ☐ Strongly Agree      ☐ Agree      ☐ Neutral      ☐ Disagree      ☐ Strongly Disagree
- g **The public GS are safe.**
- ☐ Strongly Agree      ☐ Agree      ☐ Neutral      ☐ Disagree      ☐ Strongly Disagree
- h **The public GS have lots of trees.**
- ☐ Strongly Agree      ☐ Agree      ☐ Neutral      ☐ Disagree      ☐ Strongly Disagree

## Section 5: Preference and usage of City level PGS

### 5.1 Do you visit city-level public GS?

*(City and District greens managed and maintained by NMC, PKV or Forest department within city limit like Ambazari garden, Telankhedi garden, Maharjbagh, Seminary hills etc . Or other accessible greens which are maintained by Government institutions, like VNIT, Medical College, Nagpur University etc. This does not include Gorewada lake and other outskirts areas.)*

☐ Always      ☐ Very often      ☐ Sometimes      ☐ Rarely      ☐ Never

- 5.1 a **If No, Why?**
- ☐ No time      ☐ Not interested      ☐ Faraway/ not accessible      ☐ Not well maintained      ☐ Others.....

### 5.2 How far are they from your home? (driving distance?)

☐ > 15 min      ☐ >30 min      ☐ >1 hour      ☐ >2 hours

### 5.3 How do you get from home to the city level public GS?

☐ On foot      ☐ Bicycle      ☐ 2-wheeler      ☐ 4-wheeler      ☐ Public

### 5.4 What time of the day do you normally visit city level public GS?

☐ Morning      ☐ Afternoon      ☐ Evening

### 5.5 How long you usually stay in this city level public GS?

☐ Less than 30 mins      ☐ 30 mins – 1hour      ☐ 1-2 hours      ☐ 2-3 hours      ☐ Above 3 hours

### 5.6 What activities you likely do in the city public GS? (select appropriate)s

☐ Sit and relax      ☐ Play with children/ Supervise      ☐ Walk and exercise      ☐ Yoga and meditate      ☐ Spend leisure time with friend /family

☐ Jog / run      ☐ Sports activities      ☐ Walk the dog      ☐ Others.....

### 5.7 What are your motives to visit the city public GS apart from above activities? (select appropriate)

☐ For fun time with child (ren)      ☐ For recreation      ☐ To relax and reduce stress      ☐ For peace and quite      ☐ For sunshine and fresh air

☐ To be in nature with trees and birds      ☐ For social interaction      ☐ For aesthetic experience      ☐ Others

## Section 6: NAG river redevelopment

- 6.1 **Do you live near NAG river tributaries?** ☐ Yes ☐ No
- 6.2 **How far is it from your house?** ☐ < 5mins ☐ < 10 mins ☐ < 15 mins ☐ > 15 mins
- 6.3 **If the river is cleaned with accessible edges and recreational activities, do you wish to spend your leisure time along the river edge?**  
☐ To a Great Extent ☐ Somewhat ☐ Very Little ☐ Not at All
- 6.4 **Are you aware of the NAG river rejuvenation and beautification project?** ☐ Yes ☐ No
- 6.4a **How did you come to know about the project?**  
☐ Newspaper ☐ Radio & TV ☐ Internet ☐ Social networks ☐ Others
- 6.5 **Do you want to participate in planning activities along the river edge?**  
☐ To a Great Extent ☐ Somewhat ☐ Very Little ☐ Not at All

**Thank you very much for sharing your thoughts!**

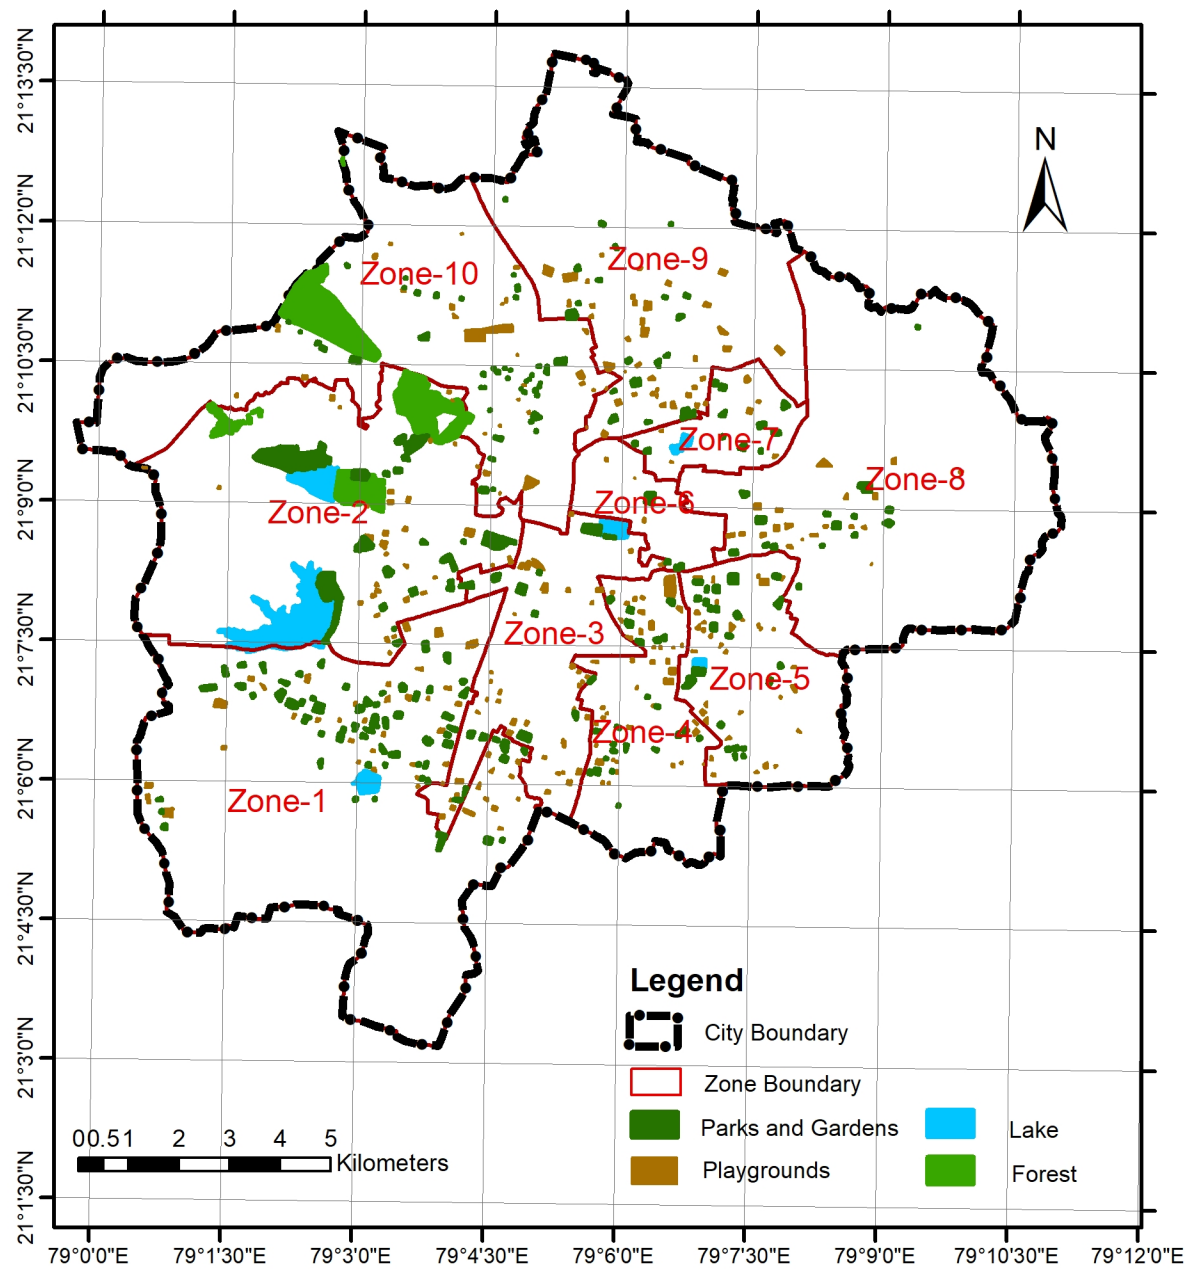

Supplement: s1 [file s1]
